# Supplementary material for: Poranění páteře a míchy
Source: Atypon-hosted journal article supplement (doi:10.57264/cer-2023-0058), 2014-03-25
Supplement: supplementary materials.docx [file supplementary%20materials.docx]

**Supplementary Table 1.** Interpretation of 12 items from the TIDieR checklist for five different interventions in ClinicalTrials.gov

| **Short description of each TIDieR item** | **Our interpretation of TIDieR item for each intervention type** | | | | |
| --- | --- | --- | --- | --- | --- |
| **Oral hygiene instructions** | **Professional mechanical plaque removal** | **Subgingival instrumentation** | **Antiseptics** | **Antibiotic** |
| **1. Brief name** | Name or phrase describing the intervention | Name or phrase describing the intervention | Name or phrase describing the intervention | Generic or brand name of the drug | Generic or brand name of the drug |
| **2. Why** | Rationale, theory or goal essential for the application of intervention (described as the gold standard in adjuvant therapy) | Rationale, theory or goal essential for the application of intervention (described as the prevention or supportive therapy) | Rationale, theory or goal essential for the application of intervention (described as the gold standard therapy) | Rationale, theory or goal essential for the application of intervention (described as the gold standard in adjuvant therapy) | Rationale, theory or goal essential for the application of intervention (described as the gold standard in adjuvant therapy) |
| **3. What (materials)** | Type of oral hygiene products, such as toothbrush, toothpaste, tongue brush, interdental brushes, floss or mouthrinse | Type (hand or powered; sonic/ultrasonic) and manufacturer of instruments used within the intervention | Type (hand or powered; sonic/ultrasonic) and manufacturer of instruments used within the intervention | Dosage form and manufacturer of the drug | Dosage form and manufacturer of the drug |
| **4. What (procedures)** | Type of brushing technique and diet instructions | 1) Type of anesthesia (plexus, conductive, topical), 2) anesthetic agent (type, dose and manufacturer), 3) scaling and 4) planing | 1) Type of anesthesia (plexus, conductive, topical), 2) anesthetic agent (type, dose and manufacturer), 3) scaling and 4) planing | 1) Time of application (before or after subgingival instrumentation) and 2) specific instructions regarding the administration (for example, allowed food and drink before or after drug exposure) | 1) Time of application (before or after subgingival instrumentation) and 2) specific instructions regarding the administration (for example, allowed food and drink before or after drug exposure) |
| **5. Who provided** | Number of intervention providers and their expertise | Number of intervention providers and their expertise | Number of intervention providers and their expertise | Number of intervention providers and their expertise | Number of intervention providers and their expertise |
| **6. How** | The modes of delivery of the intervention (verbal and/or practical, group and/or individually) | The modes of delivery of the intervention (full mouth or quadrant/sextant; specified teeth only) | The modes of delivery of the intervention (full mouth or quadrant/sextant; specified teeth only) | Route of administration of the drug | Route of administration of the drug |
| **7. Where** | Type of research center or country where the intervention was provided | Type of research center or country where the intervention was provided | Type of research center or country where the intervention was provided | Type of research center or country where the intervention was provided | Type of research center or country where the intervention was provided |
| **8. When and how much** | Time of giving instructions (before, at the beginning or during the trial) number of appointments needed for the intervention (single or multiple) and duration of giving instructions | Duration of each session and number of appointments required for complete administration of the intervention | Duration of each session and number of appointments required for complete administration of the intervention | Applied dose, dosing frequency and duration of administration | Applied dose, dosing frequency and duration of administration |
| **9. Tailoring** | Personalization of the intervention specified in the protocol | Personalization of the intervention specified in the protocol | Personalization of the intervention specified in the protocol | Personalization of the intervention specified in the protocol | Personalization of the intervention specified in the protocol |
| **10. Modifications** | Change of the intervention at the level of all participants | Change of the intervention at the level of all participants | Change of the intervention at the level of all participants | Change of the intervention at the level of all participants | Change of the intervention at the level of all participants |
| **11. How well (planed)** | Assessment whether the intervention was delivered as planned | Assessment whether the intervention was delivered as planned | Assessment whether the intervention was delivered as planned | Description of strategies for the assessment of participants’ adherence | Description of strategies for the assessment of participants’ adherence |
| **12. How well (actual)** | Recorded adherence rate or number of participants who were excluded from the study due to inadequate compliance | Description of the extent to which the intervention was delivered as planned | Description of the extent to which the intervention was delivered as planned | Recorded adherence rate or number of participants who were excluded from the study due to inadequate compliance | Recorded adherence rate or number of participants who were excluded from the study due to inadequate compliance |

**Supplementary Table 2**. Interventions registered in the Descriptive Information section of 79 trials from ClinicalTrials.gov

| **Interventions** | **No. (%) of trials** |
| --- | --- |
| 1. Only subgingival instrumentation | 9 (11.4) |
| 2. Subgingival instrumentation and 1 other intervention: |  |
| professional mechanical plaque removal | 4 (5.1) |
| oral hygiene instructions | 14 (17.7) |
| antibiotics | 4 (5.1) |
| other A |  |
| 3. Subgingival instrumentation and ≥ 2 other interventions: |  |
| professional mechanical plaque removal, oral hygiene instructions and antibiotics | 1 (1.3) |
| professional mechanical plaque removal and oral hygiene instructions | 11 (13.9) |
| professional mechanical plaque removal and antibiotics | 1 (1.3) |
| professional mechanical plaque removal and chlorhexidine | 1 (1.3) |
| oral hygiene instructions and antibiotics | 3 (3.8) |
| oral hygiene instructions and chlorhexidine | 8 (10.1) |
| oral hygiene instructions, antibiotics and chlorhexidine | 1 (1.3) |

A Out of 79 trials, 22 (27.8%) registered other interventions that were not in the focus of this study: toothpaste/mouthrinse (n=3, 3.8%), photodynamic therapy (PDT) (n=3, 3.8%), probiotics (n=2, 2.5%), laser (n=2, 2.5%), samples and measurement or diagnostic test (n=2, 2.5%), omega-3 and aspirin (n=1, 1.3%), supportive periodontal therapy (n=1, 1.3%), bisphosphonates (n=1, 1.3%), extraction (n=1, 1.3%), dietary supplements (n=1, 1.3%), aloe vera (n=1, 1.3%), hyperbaric oxygen therapy (HBOT) (n=1, 1.3%), ozone (n=1, 1.3%), glutaraldehyde and phosphoric acid (n=1, 1.3%) and anesthetics (n=1, 1.3%).

**Supplementary Table 3.** Heterogeneity of terms describing interventions recorded in 79 ClinicalTrials.gov analyzed trials

| **Intervention** | **Terminology used within ClinicalTrials.gov** |
| --- | --- |
| **Oral hygiene instructions** | - oral hygiene instructions (OHI) - oral hygiene education (OHE) |
| **Professional mechanical plaque removalA** | - supragingival scaling, supragingival calculus removal, supragingival debridement, supragingival removal of deposits, supragingival removal of plaque and calculus, supragingival decontamination, supragingival mechanical instrumentation, supragingival full-mouth decontamination, supra-gingival debridement, supra-gingival mechanical instrumentation, initial supragingival scaling - oral prophylaxis, professional prophylaxis, dental prophylaxis, removal superficial plaque |
| **Subgingival instrumentationA** | - subgingival scaling, deep scaling, scaling and root planing, SRP, periodontal scaling and root planing, scaling root planing, subgingival scaling and root planing, periodontal scaling, scaling, dental scaling, de-scaling, dental scaling and cleaning - non-surgical periodontal therapy, non-surgical instrumentation, non-surgical periodontal debridement, non-surgical periodontal treatment, non-surgical mechanical periodontal treatment, initial non-surgical periodontal therapy, nonsurgical periodontal treatment - periodontal prophylaxis, periodontal debridement, periodontal instrumentation, full mouth debridement, subgingival debridement, intensive periodontal therapy, deep cleaning, initial periodontal treatment, initial periodontal therapy - subgingival mechanical instrumentation |
| **Antiseptics** | - chlorhexidine - subgingival irrigation, chemical plaque control |
| **Antibiotics** | - antibiotic, antibiotic intervention - only generic name (doxycycline, amoxicillin, metronidazole, azithromycin) |

AIn this study we considered “professional mechanical plaque removal“ and “subgingival instrumentation“ as standard terms according to their use in the latest clinical practice guidelines (Sanz, Herrera et al 2020).

**Supplementary Table 4.** Characteristics of trial conduct in 79 trials registered in ClinicalTrials.gov

| **Conduct characteristics** | **No. (%) of trials** |
| --- | --- |
| Location |  |
| Non-US | 35 (44.3) |
| US | 3 (3.8) |
| UK | 2 (2.5) |
| EU | 6 (7.6) |
| Not provided | 33 (41.8) |
| Investigators |  |
| Provided | 48 (60.8) |
| Not provided | 31 (39.2) |
| Sponsor |  |
| University | 71 (89.9) |
| Individual person | 2 (2.5) |
| Community-based organization | 4 (5.10) |
| Pharmaceutical industry | 2 (2.5) |
| Funder |  |
| Industry | 1 (1.3) |
| Other | 69 (87.3) |
| Other + Industry | 5 (6.3) |
| Other + NIH | 1 (1.3) |
| Not provided | 3 (3.8) |
| Start year |  |
| Provided (median 2014, 95% CI 2014-2016, range 2002-2019) | 78 (98.7) |
| Not provided | 1 (1.3) |
| Primary completion year A |  |
| Provided (median 2016, 95% CI 2015-2017, range 2008-2022) | 77 (97.5) |
| Not provided | 2 (2.5) |
| Study completion year B |  |
| Provided (median 2016, 95% CI 2015-2017, range 2003-2023) | 77 (97.5) |
| Not provided | 2 (2.5) |

*Abbreviations:* US, United States; UK, United Kingdom; EU, European Union; NIH, National Institutes of Health.

AAccording to the CT.gov Glossary of common terms: “The date on which the last participant in a clinical study was examined or received an intervention to collect final data for the primary outcome measure.”

BAccording to the CT.gov Glossary of common terms: “The date on which the last participant in a clinical study was examined or received an intervention/treatment to collect final data for the primary outcome measures, secondary outcome measures, and adverse events.”

**Supplementary Table 5.** The reporting quality of 12 items for antiseptics in 10 trials registered in ClinicalTrials.gov A

| TIDieR item | Intervention description component | No, (%) of trials |
| --- | --- | --- |
| 1. Brief name | Provided generic name | 7 (70.0) |
| Provided generic and brand name | 3 (30.0) |
| 2. Why | Noted, but insufficiently described B | 1 (10.0) |
| Not provided | 9 (90.0) |
| 3. What (materials) | Pharmaceutical dosage form |  |
| Provided | 10 (100.0) |
| Manufacturer |  |
| Not provided | 10 (100.0) |
| 4. What (procedure) | Provided only time of application | 7 (70.0) |
| Provided time of application and specific | 1 (10.0) |
| instructions |  |
| Not provided | 2 (20.0) |
| 5. Who provided | Intervention provider |  |
| Provided C | 5 (50.0) |
| Not provided | 5 (50.0) |
| Number of intervention providers |  |
| Provided | 5 (50.0) |
| Not provided | 5 (50.0) |
| 6. How | Route of administration |  |
| Provided only pharmaceutical dosage form | 7 (70.0) |
| Provided both pharmaceutical dosage form | 3 (30.0) |
| and route of administration |  |
| 7. Where | Recruitment or investigation center D | 5 (50.0) |
| Not provided | 5 (50.0) |
| 8. When and how much | Duration of administration |  |
| Provided clearly | 5 (50.0) |
| Provided, but unclear E | 3 (30.0) |
| Not provided | 2 (20.0) |
| Dose |  |
| Provided only concentration | 4 (40.0) |
| Provided both concentration and dose | 3 (30.0) |
| Not provided | 3 (30.0) |
| Dosing frequency |  |
| Provided | 7 (70.0) |
| Not provided | 3 (30.0) |
| 9. Tailoring | Provided | 1 (10.0) |
| Not provided | 9 (90.0) |

*Abbreviation:* TIDieR, Template for Intervention Description and Replication.

None of the trials had results therefor items 10 and 12 could not be determined. Additionally, none of the trials provided item 11 and described strategies for the assessment of participants’ adherence.

BOne (10%) trial presented rationale, theory or goal but did not presented it as adjuvant therapy in addition to subgingival instrumentation (chlorhexidine was used only to hide the smell of cigarettes from oral cavity) (NCT02744417).

CTwo trials (20.0%) did not explain the expertise of intervention provider (“examiner“ as the only used term) (NCT02208739, NCT01951547).

DTwo (20%) trials noted the investigation center where intervention was administered (NCT02208739, NCT01951547), two (20%) noted investigation center or country under the Recruitment Information section and not within the Descriptive Information section (NCT04520438, NCT02215460), and one (10%) provided only data on recruitment center without clearly defining the center where the intervention was administered.

EProvided only information on the moment when treatment will be performed, but the duration of treatment was not clearly stated (NCT03410602, NCT02744417, NCT00997178).

**Supplement Table 6**. The reporting quality of 12 items for antibiotics in 10 trials registered in ClinicalTrials.gov A

| TIDieR item | Intervention description component | No. (%) of trials |
| --- | --- | --- |
| 1. Brief name | Provided generic name | 8 (80.0) |
| Provided generic and brand name | 2 (20.0) |
| 2. Why | Precisely stated (“adjuvant therapy”) | 8 (80.0) |
| Not provided | 2 (20.0) |
| 3. What (materials) | Pharmaceutical dosage form |  |
| Provided | 5 (50.0) |
| Not provided | 5 (50.0) |
| Manufacturer |  |
| Provided | 1 (10.0) |
| Not provided | 90 (90.0) |
| 4. What (procedure) | Provided only time of application | 4 (40.0) |
| None other data provided | 6 (60.0) |
| 5. Who provided | Intervention provider |  |
| Imprecisely stated B | 2 (20.0) |
| Not provided | 8 (80.0) |
| Number of intervention providers |  |
| Provided | 1 (10.0) |
| Not provided | 9 (90.0) |
| 6. How | Provided only dosage form | 2 (20.0) |
| Provided only route of administration | 1 (10.0) |
| Provided both dosage form and route | 2 (20.0) |
| Provided only term “systemic” | 4 (40.0) |
| None data provided | 1 (10.0) |
| 7. Where | Recruitment or investigation center noted C | 5 (50.0) |
| Not provided | 5 (50.0) |
| 8. When and how much | Duration of administration |  |
| Clearly stated | 9 (90.0) |
| Provided, but unclear D | 1 (10.0) |
| Dose |  |
| Provided | 7 (70.0) |
| Not provided | 3 (30.0) |
| Dosing frequency |  |
| Clearly stated | 7 (70.0) |
| Provided, but unclear D | 1 (10.0) |
| Not provided | 2 (20.0) |

*Abbreviation: TIDieR,* Template for Intervention Description and Replication.

ANone of the trials had results therefor items 10 and 12 could not be determined. Additionally, none of the trials provided items 9 and 11 and reported information regarding personalization in the protocol or described strategies for the assessment of participants’ adherence.

BNot clear is it referred to antibiotic administration or other intervention described in the same trial (NCT03343366, NCT03629288).

CTwo (20.0%) trials noted investigation center or country under the Recruitment Information section and not within the Descriptive Information section (NCT03343366, NCT02215460) and three (30.0%) trials provided only data on recruitment center without clearly defining the center where the intervention was administered (NCT01595594, NCT02487186, NCT02215460).

DProvided the term „single session” (NCT02487186).
